# Supplementary material
Source: publisher figshare collection journal article supplement (https://acs.figshare.com/ndownloader/files/5325190)
Supplement: Supplementary file 1 [file 5325190]

# Supporting Information

## A Convenient Route to Monocarba-*closo*-dodecaborate Anions

Naoki Tanaka, Yoshiaki Shoji,\* and Takanori Fukushima

Laboratory for Chemistry and Life Science, Institute of Innovative Research, Tokyo Institute of Technology, 4259 Nagatsuta, Midori-ku, Yokohama 226-8503 (Japan)

(E-mail: yshoji@res.titech.ac.jp)

### Table of Contents

|                                                                              |     |
|------------------------------------------------------------------------------|-----|
| 1. Analytical Data for $\text{Me}_3\text{NH}^+\cdot 3$ (Figures S1–S4) ..... | S2  |
| 2. Analytical Data for $\text{Me}_3\text{NH}^+\cdot 1$ (Figures S5–S8) ..... | S6  |
| 3. Analytical Data for $\text{Cs}^+\cdot 1$ (Figures S9–S12) .....           | S10 |
| 4. Analytical Data for $\text{Cs}^+\cdot 4$ (Figures S13–S16) .....          | S14 |
| 5. Supporting Figures (Figures S17–S19) .....                                | S18 |

## 1. Analytical Data for $\text{Me}_3\text{NH}^+\cdot\mathbf{3}$

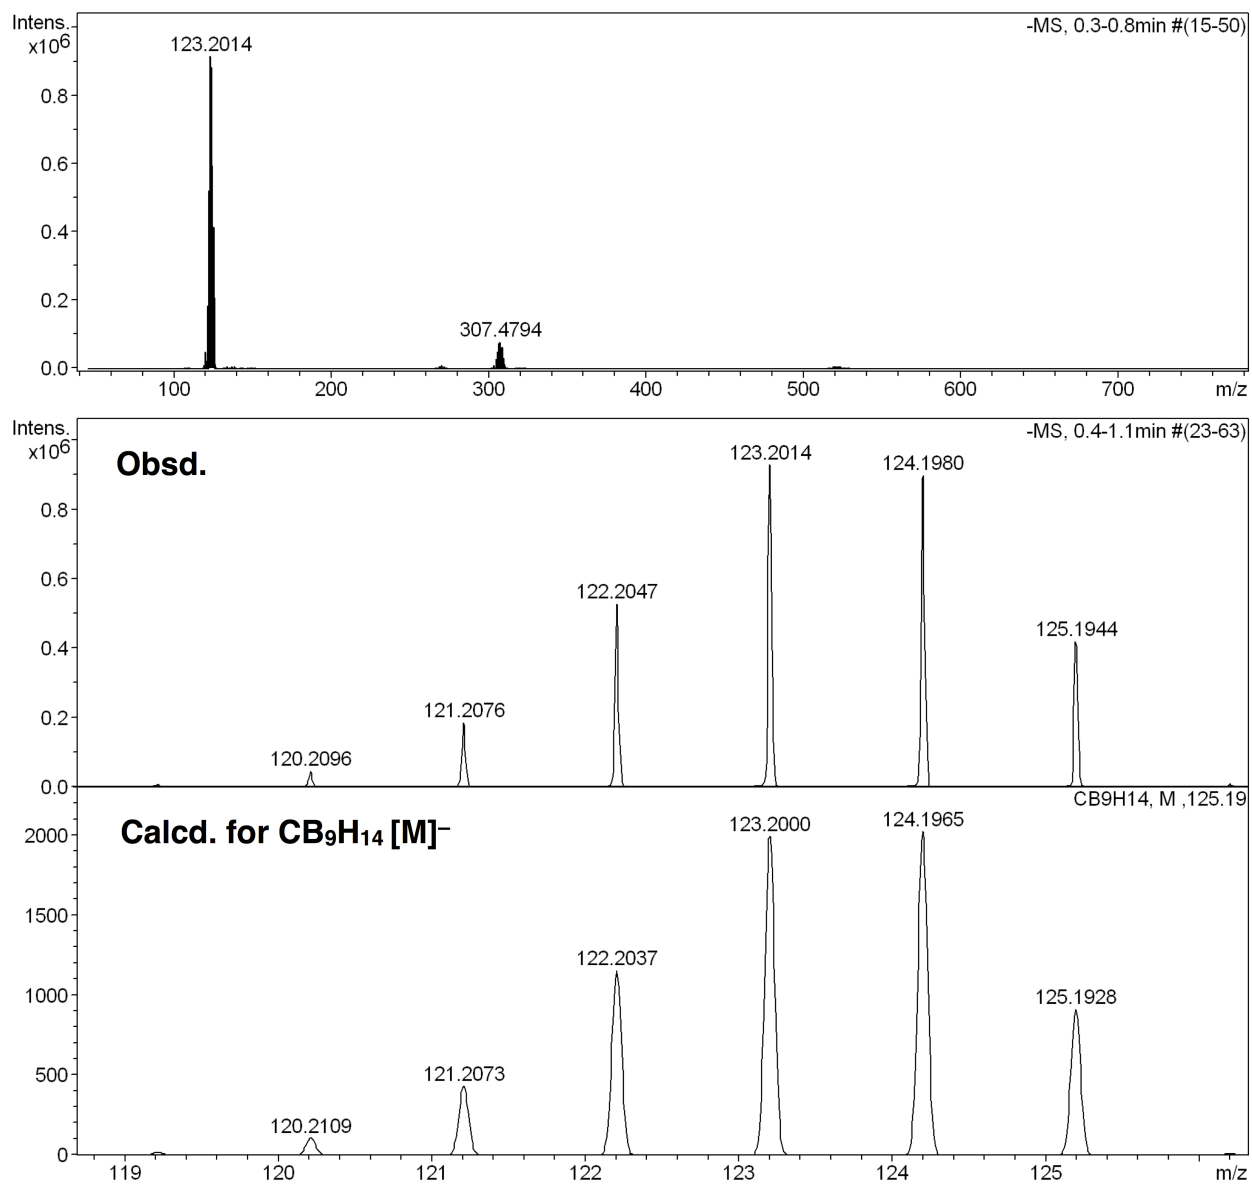

**Figure S1.** ESI-TOF MS spectrum of  $\text{Me}_3\text{NH}^+\cdot\mathbf{3}$ .

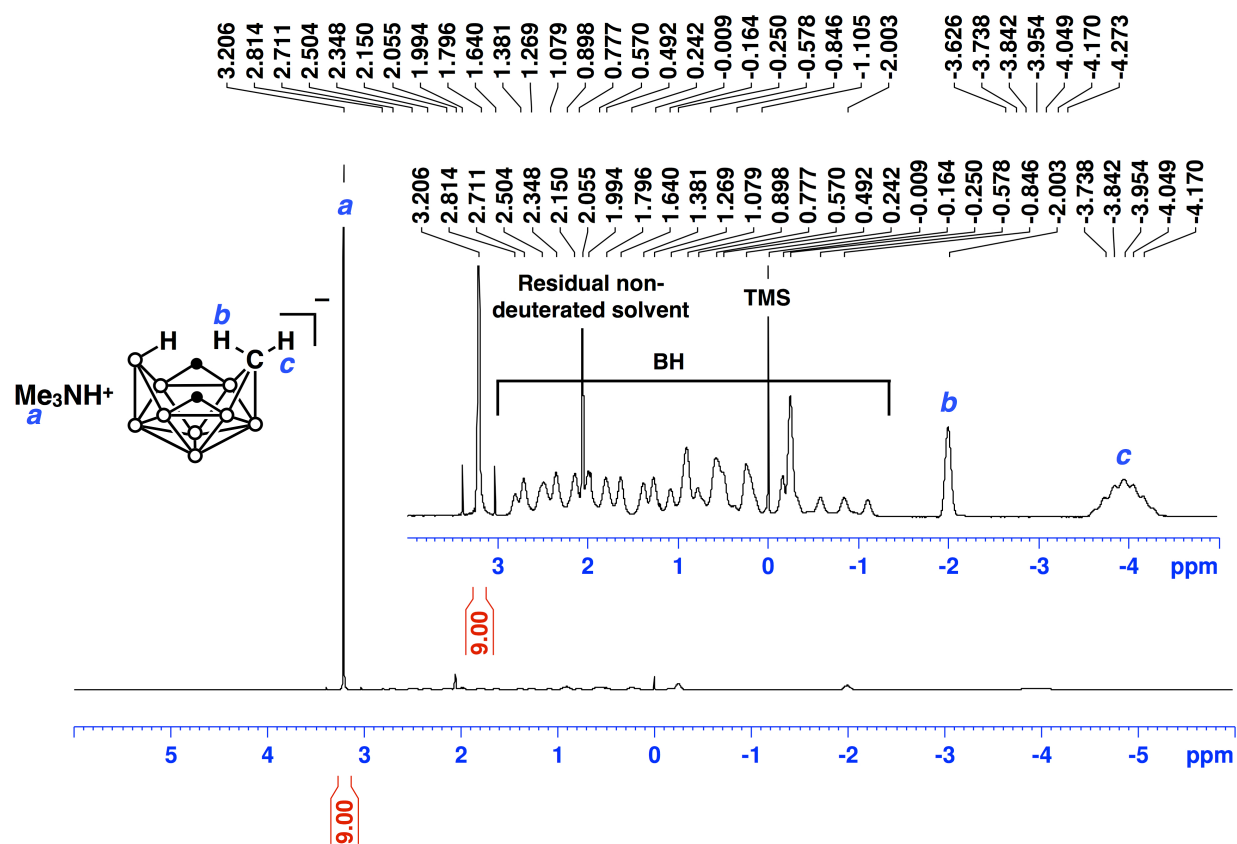

**Figure S2.**  $^1\text{H}$  NMR spectrum (400 MHz) of  $\text{Me}_3\text{NH}^+\cdot\mathbf{3}$  in acetone- $d_6$  at 25 °C.

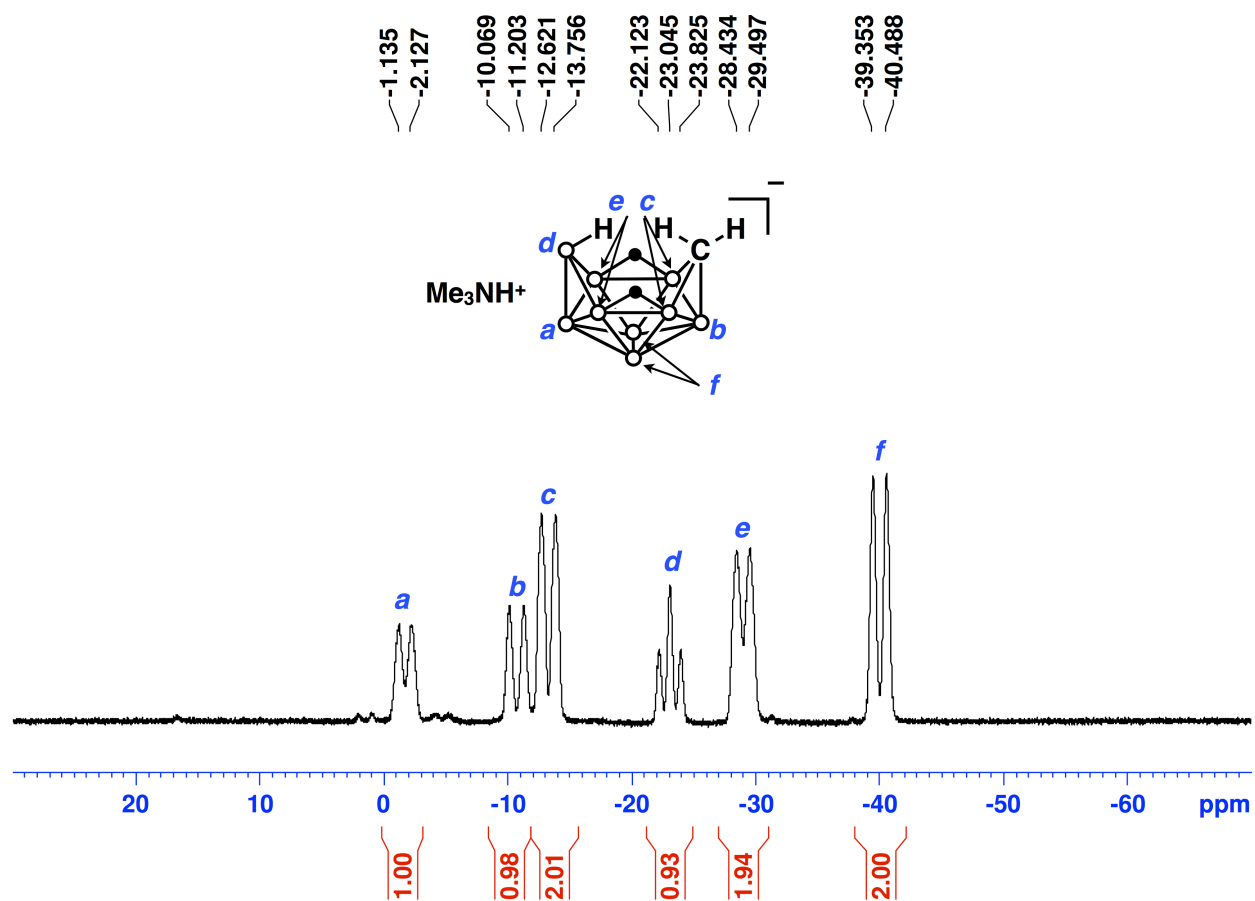

**Figure S3.**  $^{11}\text{B}$  NMR spectrum (128 MHz) of  $\text{Me}_3\text{NH}^+\cdot\mathbf{3}$  in acetone- $d_6$  at 25 °C.



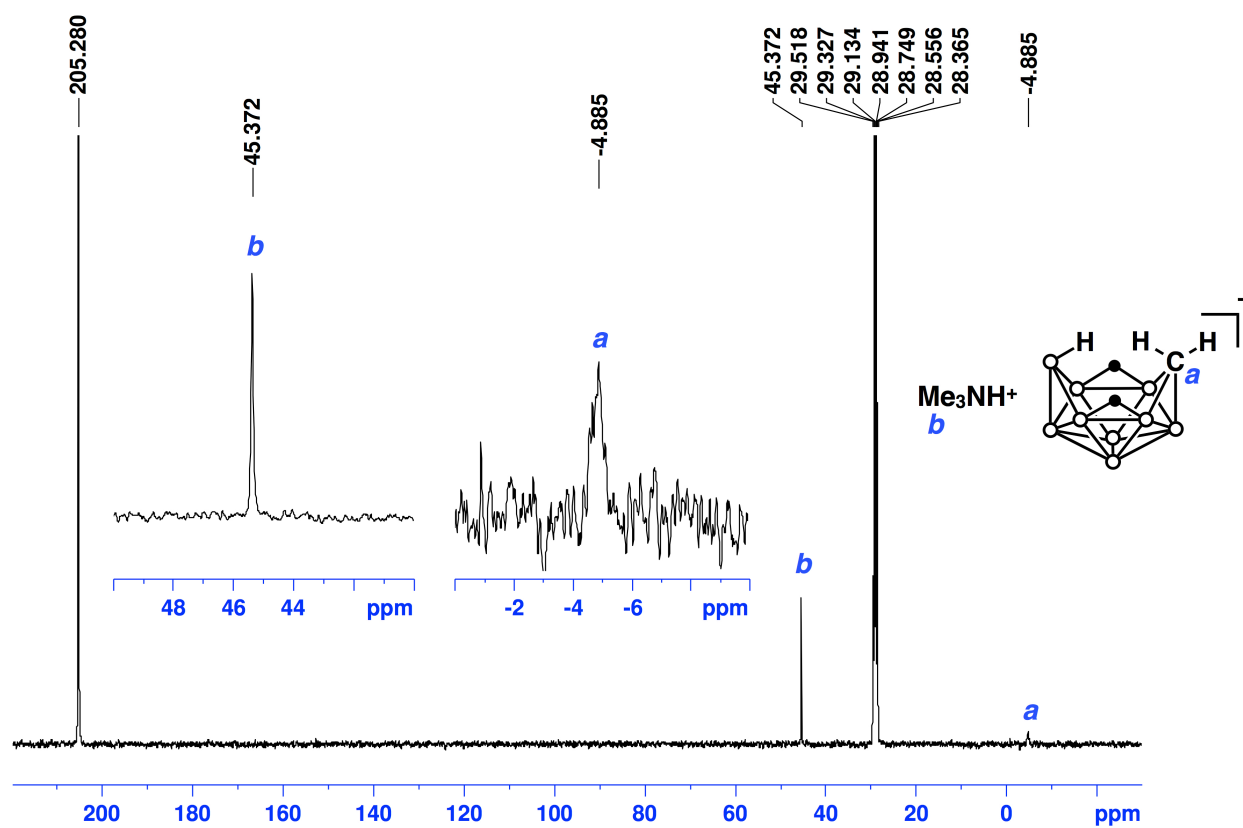

**Figure S4.**  $^{13}\text{C}$  NMR spectrum (100 MHz) of  $\text{Me}_3\text{NH}^+\cdot\mathbf{3}$  in  $\text{acetone-}d_6$  at  $25^\circ\text{C}$ .

## 2. Analytical Data for $\text{Me}_3\text{NH}^+\cdot\mathbf{1}$

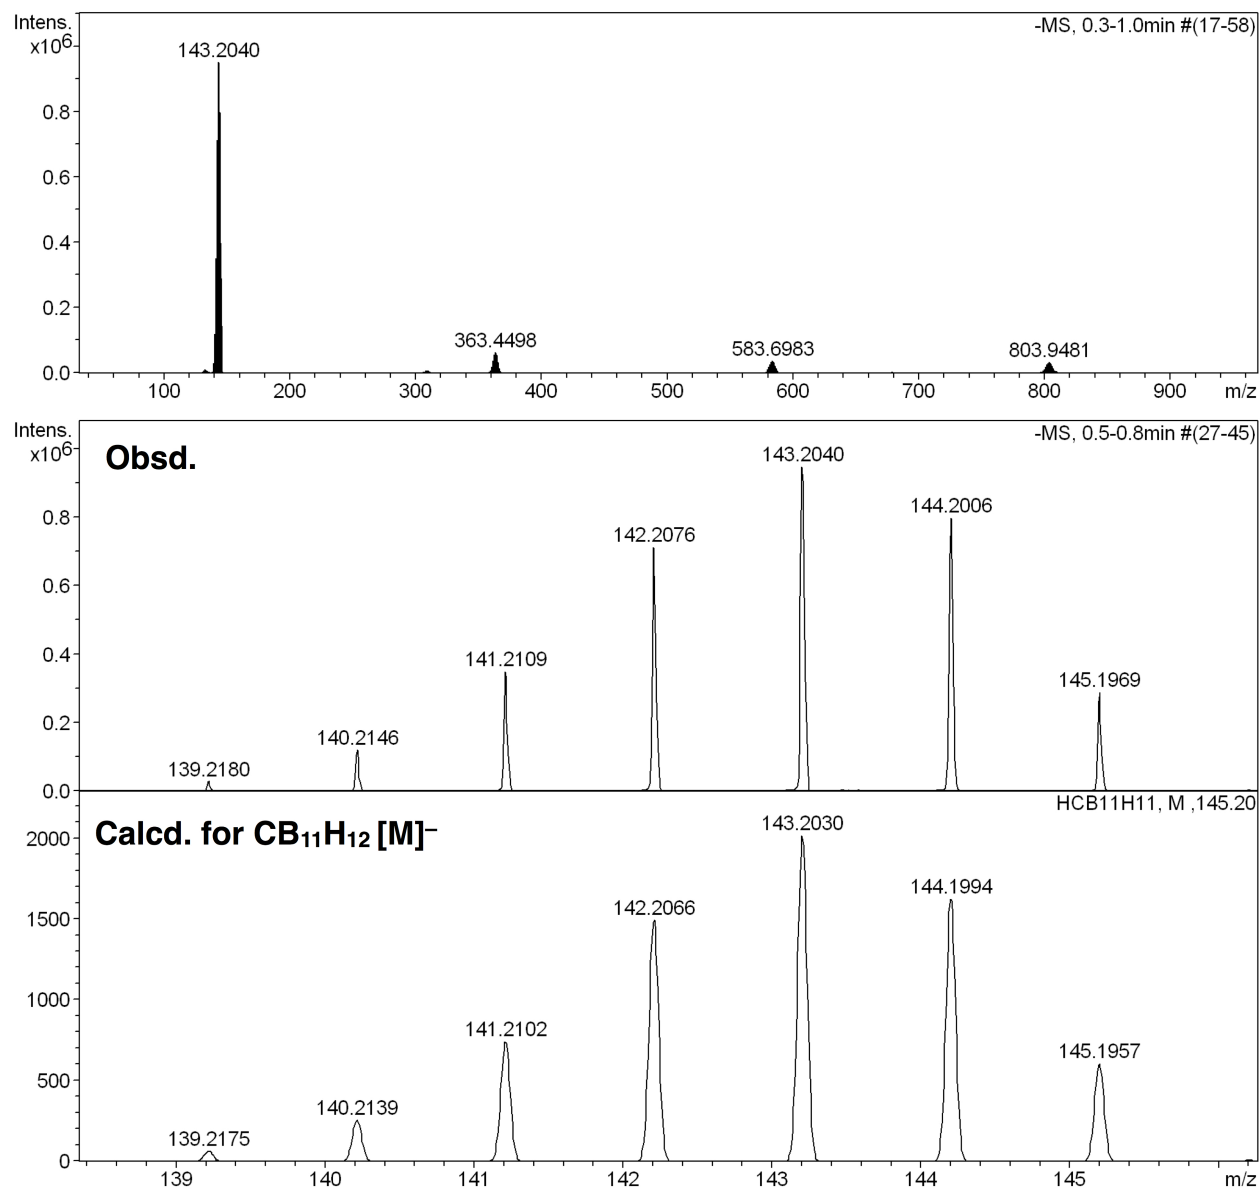

**Figure S5.** ESI-TOF MS spectrum of  $\text{Me}_3\text{NH}^+\cdot\mathbf{1}$ .

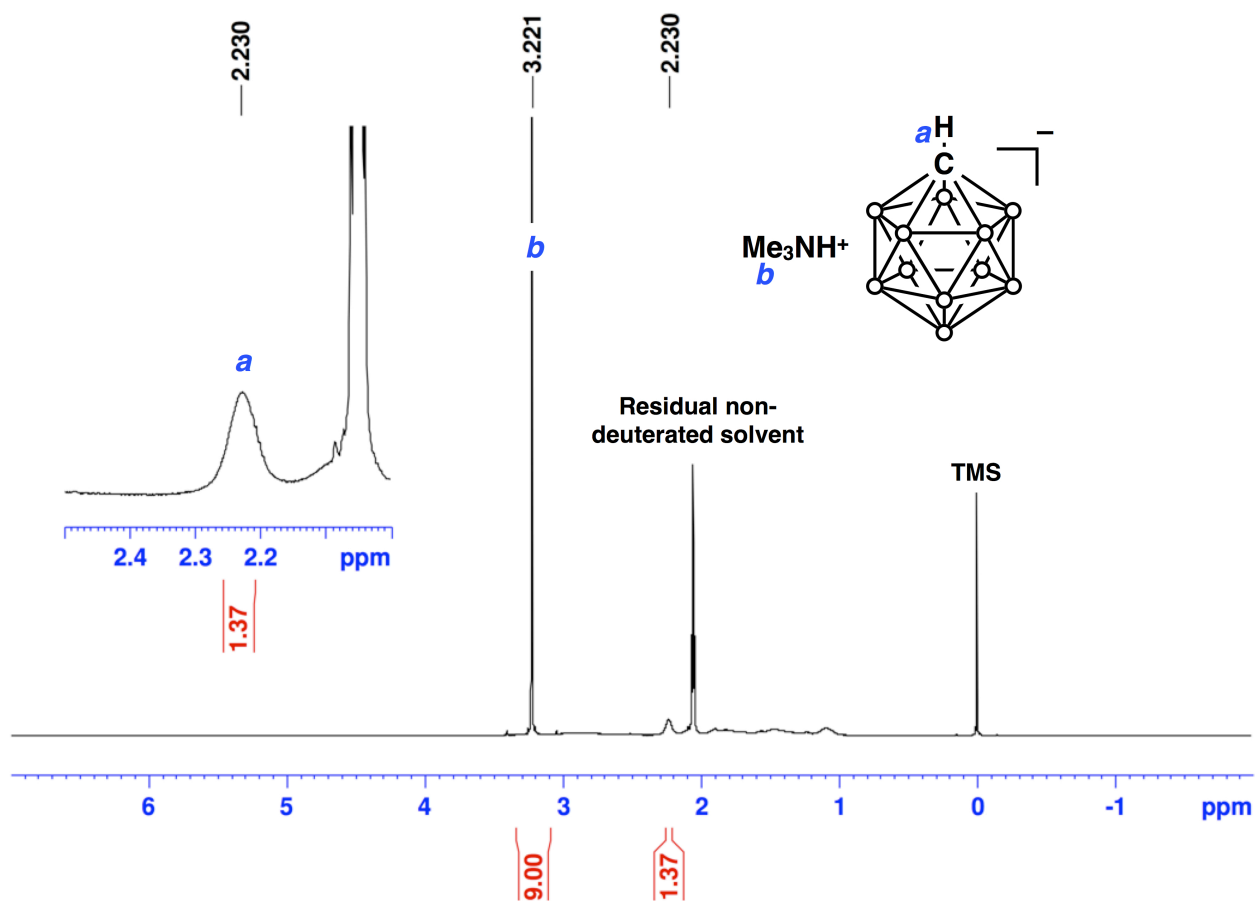

**Figure S6.**  $^1\text{H}$  NMR spectrum (400 MHz) of  $\text{Me}_3\text{NH}^+\cdot\mathbf{1}$  in  $\text{acetone-}d_6$  at  $25\text{ }^\circ\text{C}$ .

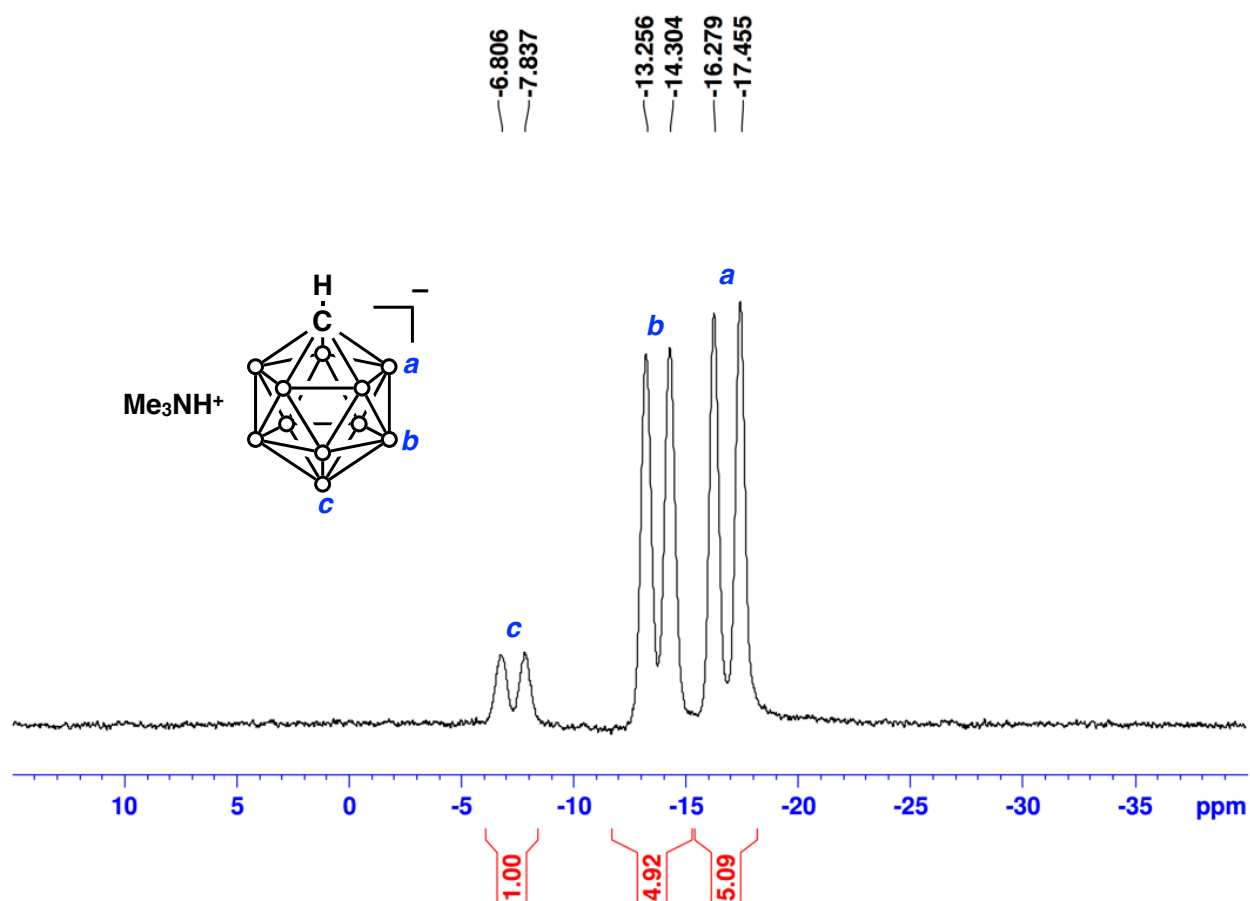

**Figure S7.**  $^{11}\text{B}$  NMR spectrum (128 MHz) of  $\text{Me}_3\text{NH}^+\bullet\mathbf{1}$  in  $\text{acetone-}d_6$  at  $25\text{ }^\circ\text{C}$ .

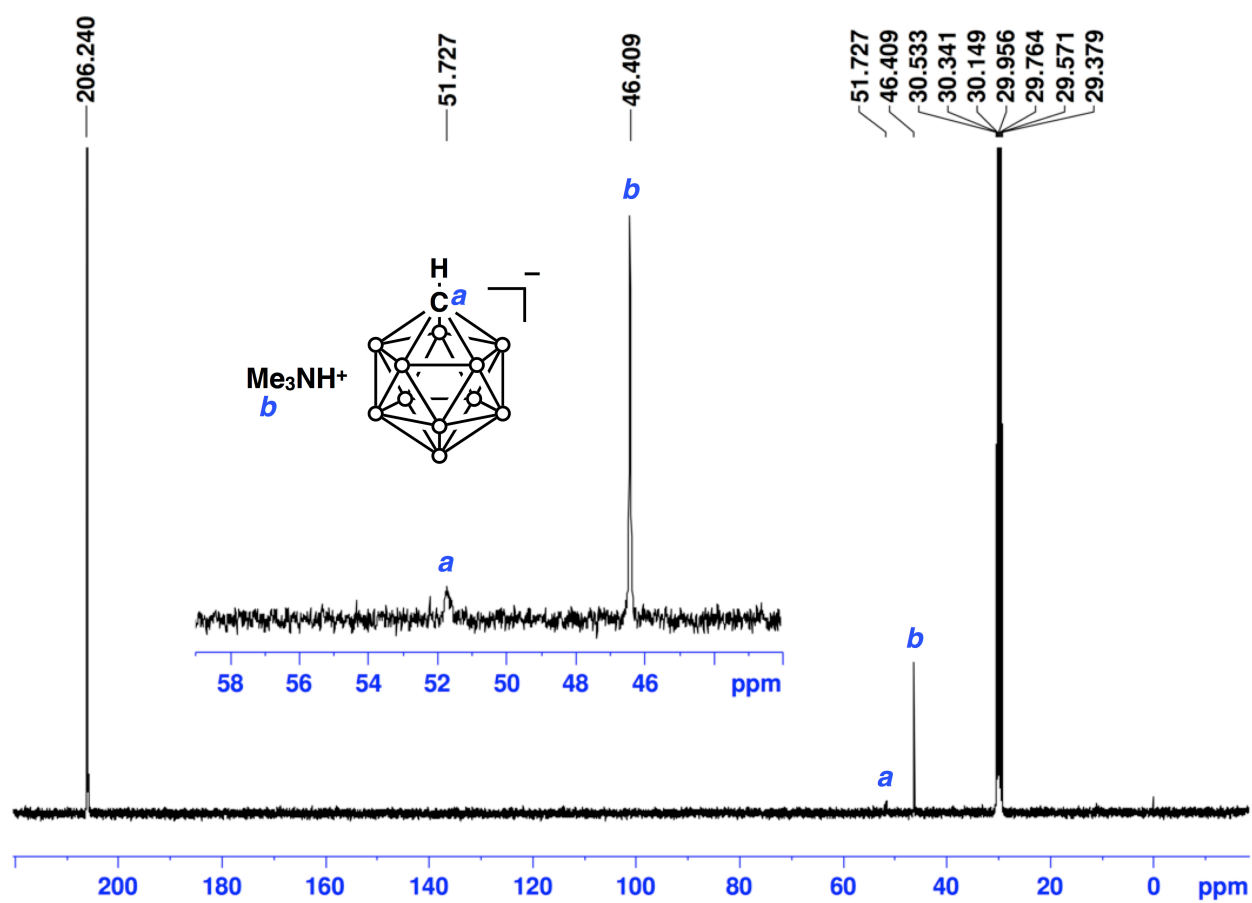

**Figure S8.**  $^{13}\text{C}$  NMR spectrum (100 MHz) of  $\text{Me}_3\text{NH}^+\cdot\mathbf{1}$  in  $\text{acetone-}d_6$  at  $25^\circ\text{C}$ .

### 3. Analytical Data for $\text{Cs}^+\cdot\mathbf{1}$

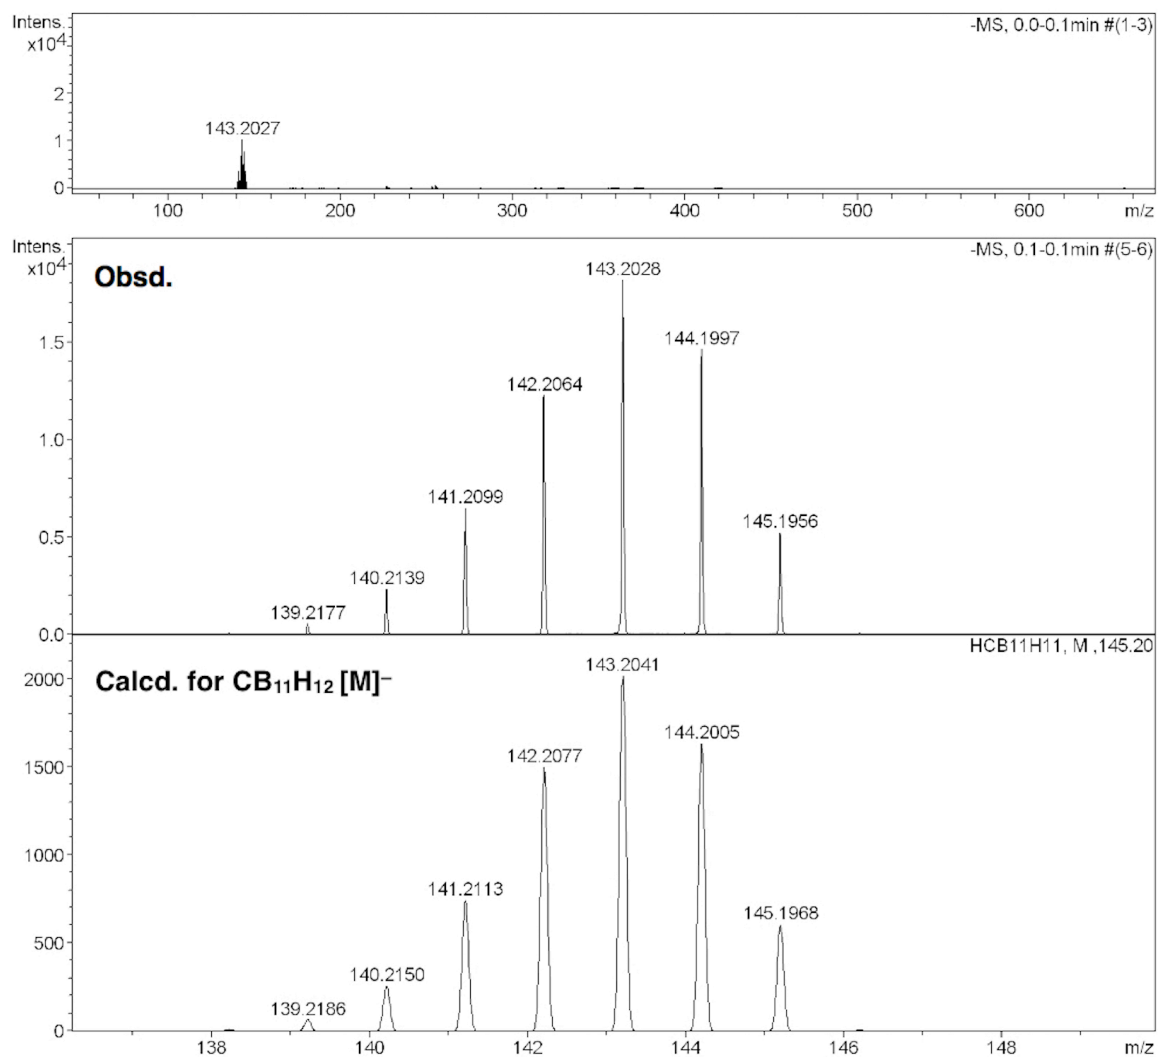

**Figure S9.** ESI-TOF MS spectrum of  $\text{Cs}^+\cdot\mathbf{1}$ .

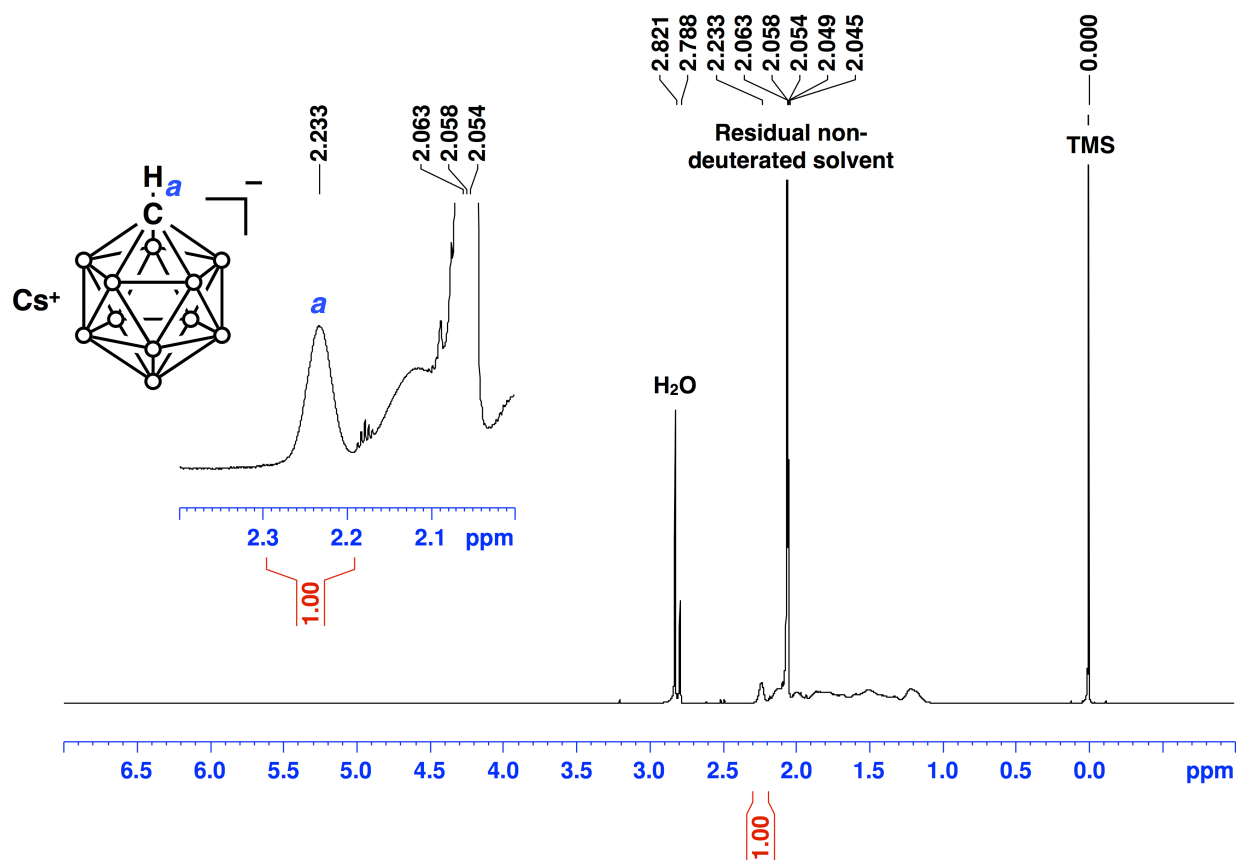

**Figure S10.**  $^1\text{H}$  NMR spectrum (400 MHz) of  $\text{Cs}^+\bullet\mathbf{1}$  in  $\text{acetone-}d_6$  at  $25\text{ }^\circ\text{C}$ .

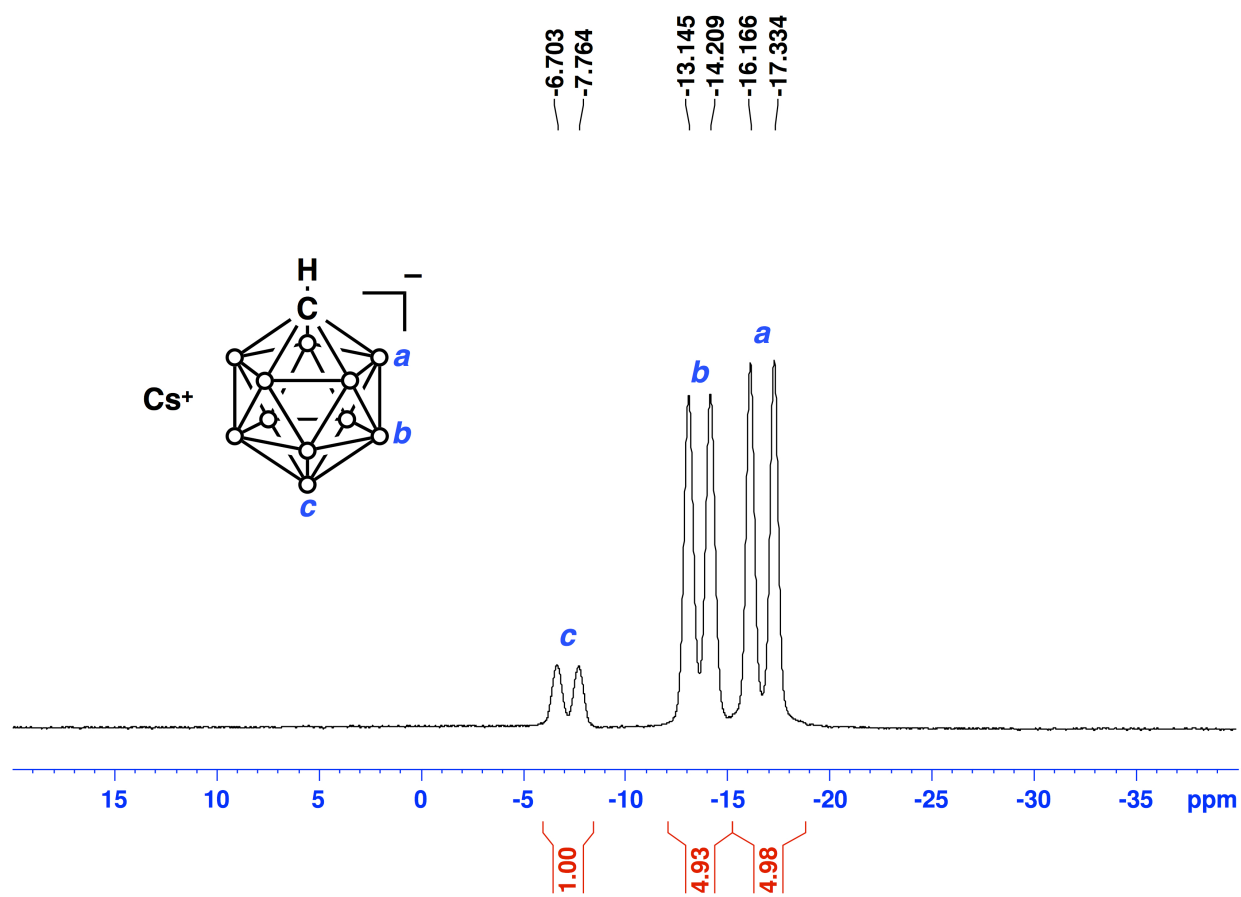

**Figure S11.**  $^{\text{11}}\text{B}$  NMR spectrum (128 MHz) of  $\text{Cs}^+\bullet\mathbf{1}$  in acetone- $d_6$  at 25 °C.



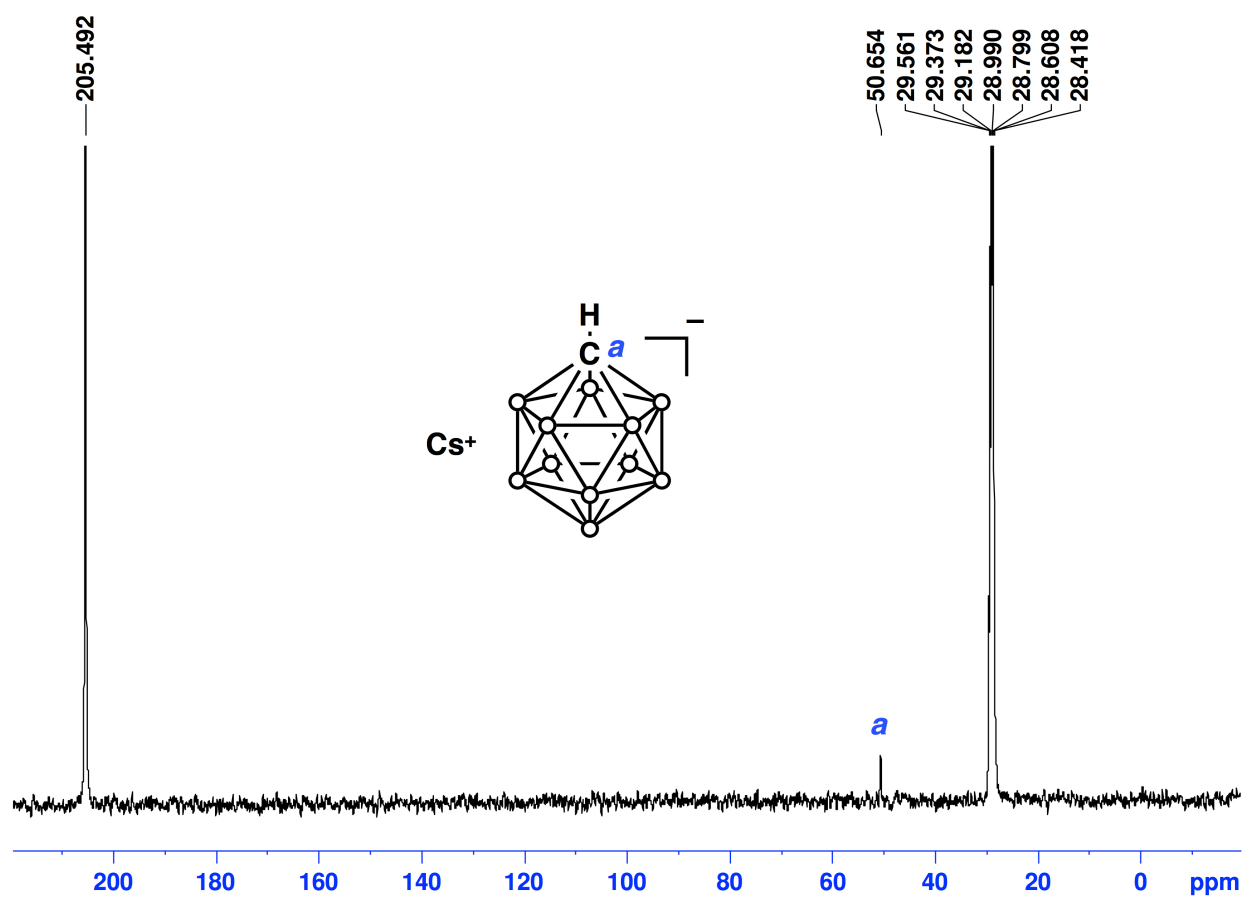

**Figure S12.**  $^{13}\text{C}$  NMR spectrum (100 MHz) of  $\text{Cs}^+\bullet\mathbf{1}$  in  $\text{acetone-}d_6$  at  $25^\circ\text{C}$ .

#### 4. Analytical Data for $\text{Cs}^+\bullet 4$

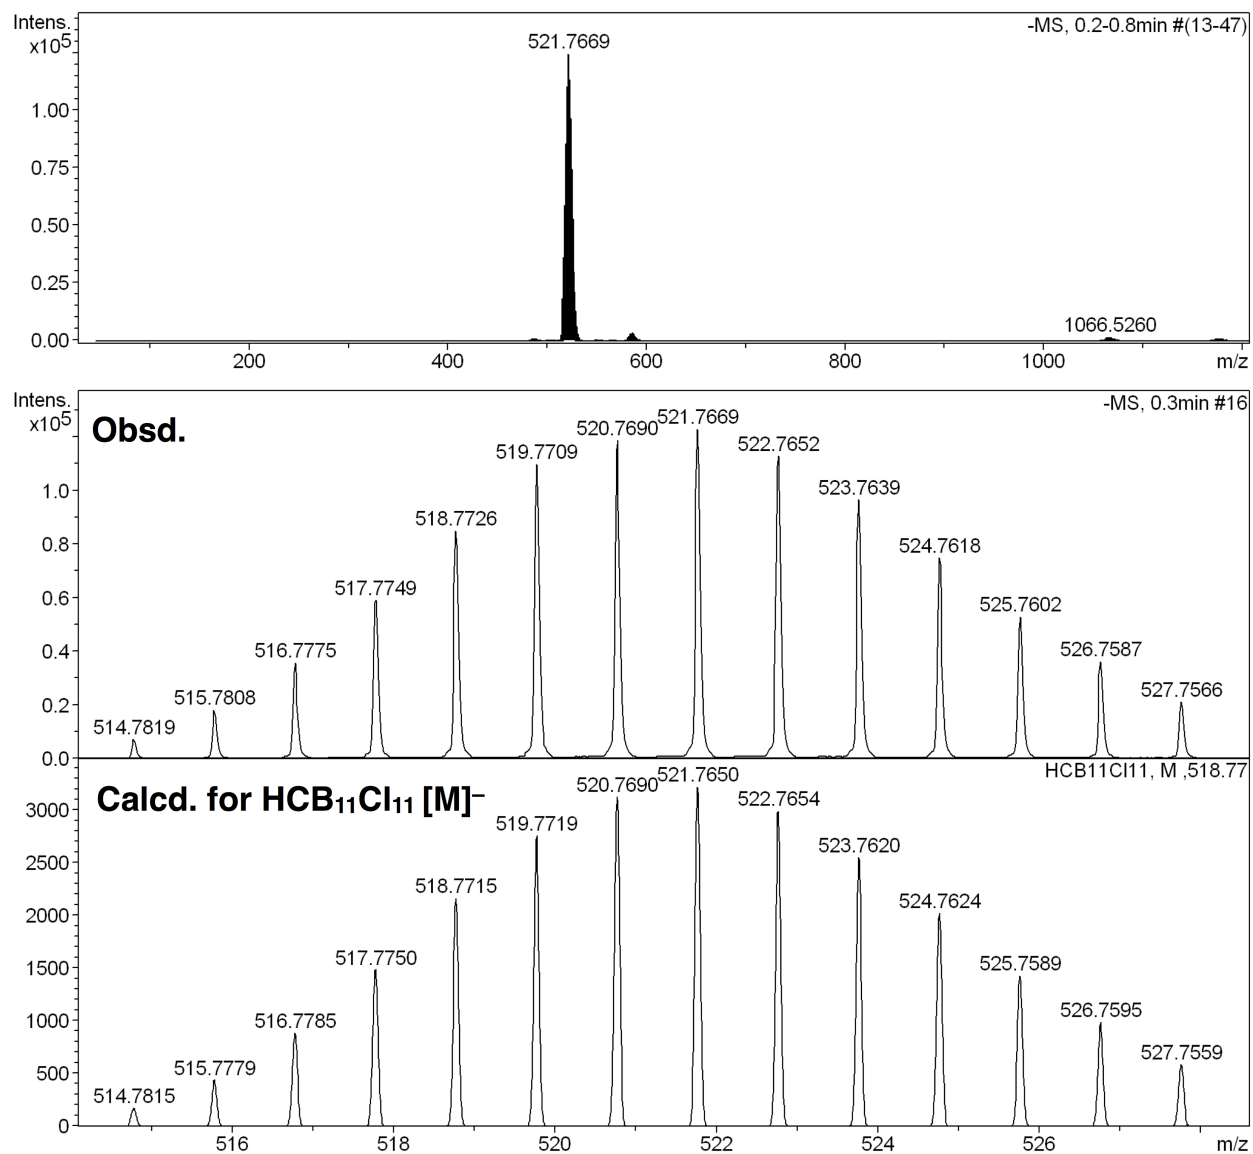

**Figure S13.** ESI-TOF MS spectrum of  $\text{Cs}^+\bullet 4$ .

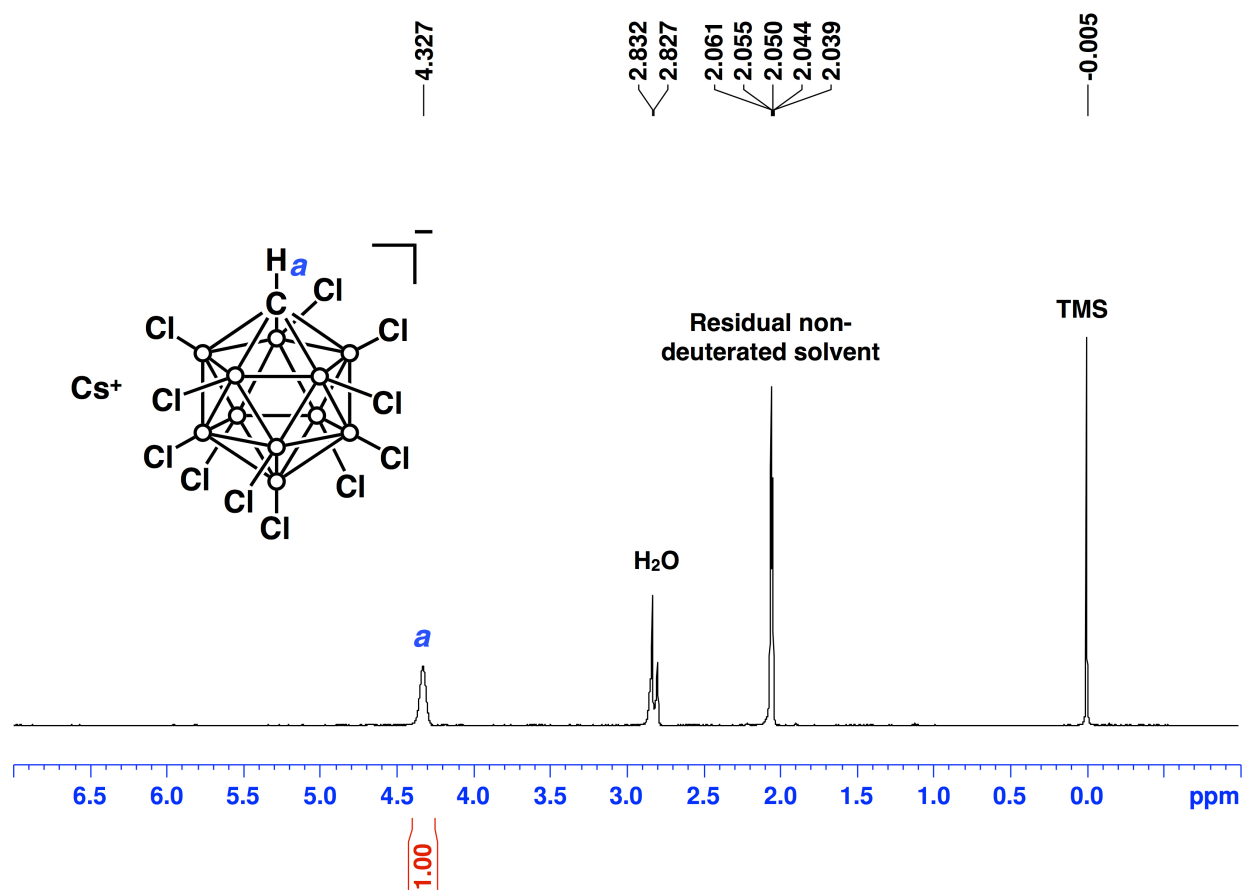

**Figure S14.**  $^1\text{H}$  NMR spectrum (400 MHz) of  $\text{Cs}^+\bullet\mathbf{4}$  in acetone- $d_6$  at 25 °C.

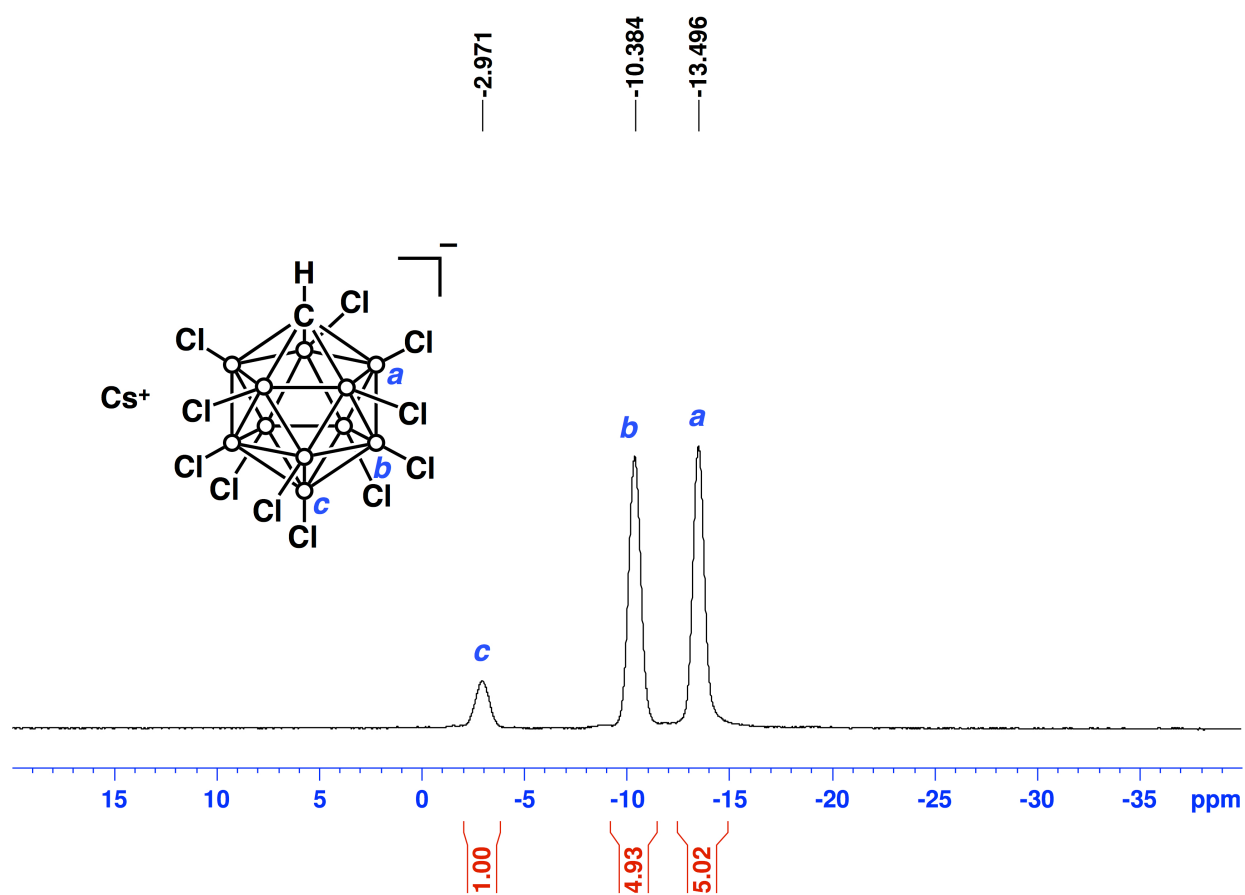

**Figure S15.**  $^{11}\text{B}$  NMR spectrum (128 MHz) of  $\text{Cs}^+ \cdot \mathbf{4}$  in acetone- $d_6$  at 25 °C.

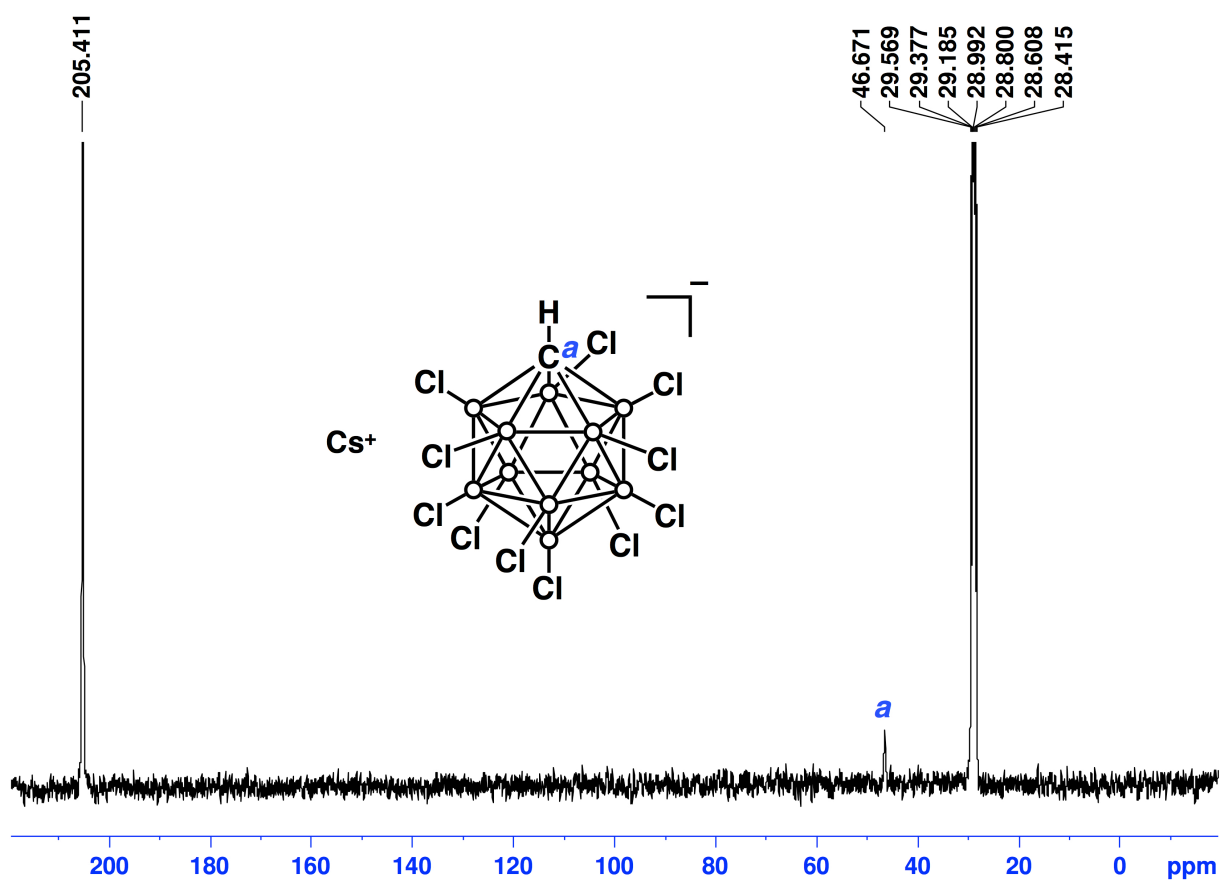

**Figure S16.**  $^{13}\text{C}$  NMR spectrum (100 MHz) of  $\text{Cs}^+\bullet\mathbf{4}$  in  $\text{acetone-}d_6$  at  $25\text{ }^\circ\text{C}$ .

## 5. Supporting Figures

Data: <Untitled>.O19[c] 4 Jun 2014 17:03 Cal: 12 Mar 2010 9:40

Shimadzu Biotech Axima CFRplus 2.9.3.20110624: Mode Reflectron\_neg, Power: 100, P.Ext. @ 521 (bin 57)

%Int. 171 mV[sum= 5141 mV] Profiles 1-30 Smooth Av 20

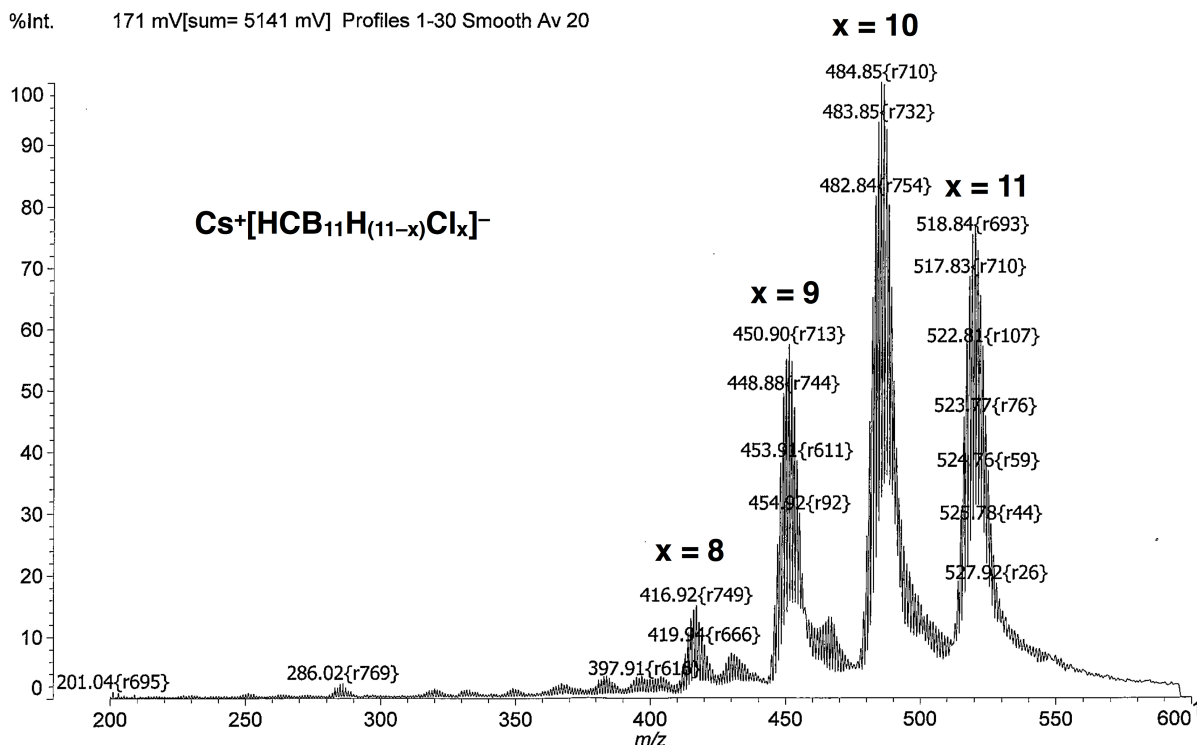

**Figure S17.** MALDI-TOF MS spectrum of a reaction mixture obtained after refluxing a  $\text{SO}_2\text{Cl}_2$  solution of  $\text{Cs}^+\cdot\mathbf{1}$  under argon for 1 week.

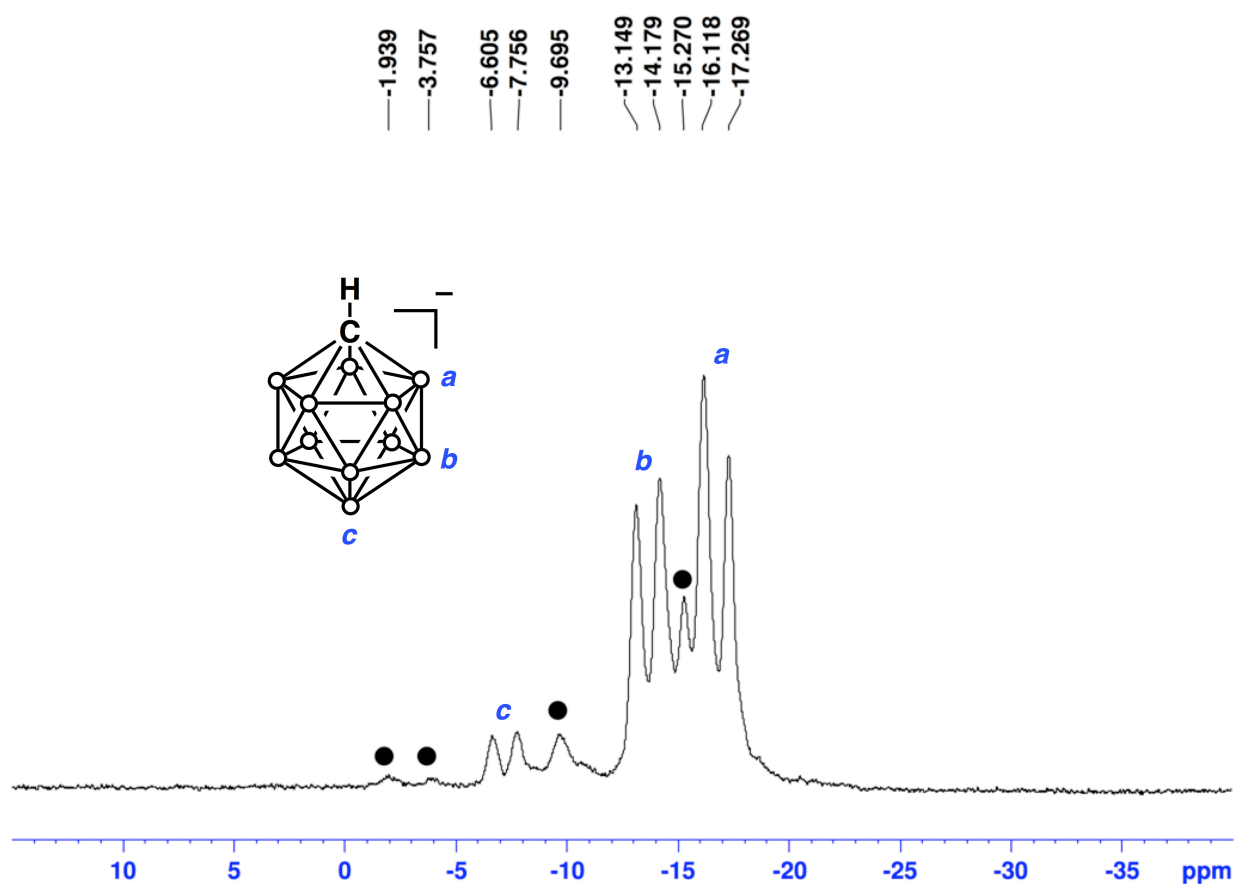

**Figure S18.**  $^{11}\text{B}$  NMR spectrum (128 MHz) of a reaction mixture obtained after the reaction of  $\text{Me}_3\text{NH}^+\cdot\mathbf{3}$  with  $\text{BH}_3\cdot\text{SMe}_2$  followed by washing with hot water. Peaks associated with black circles (•) are due to a boron-containing byproduct.

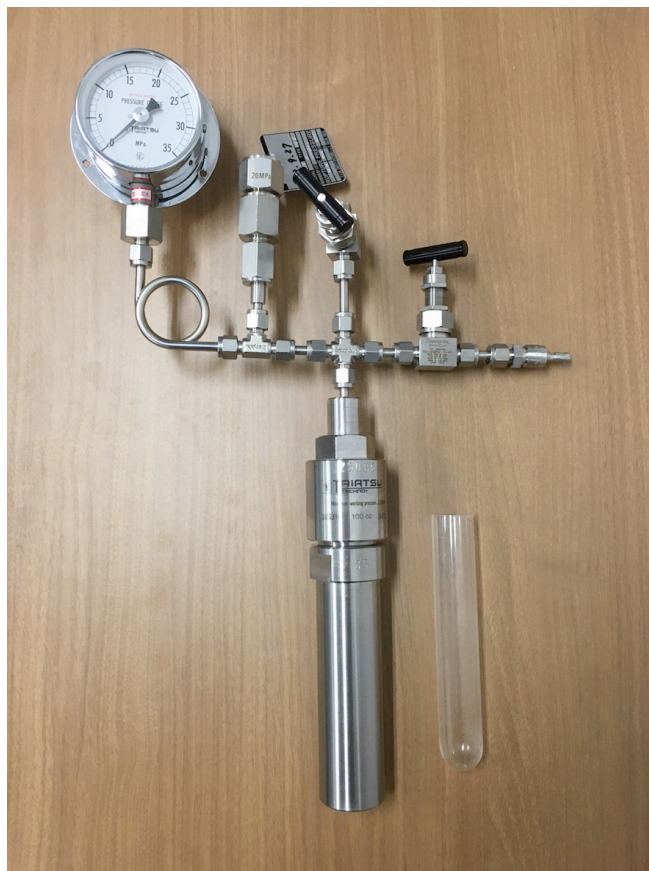

**Figure S19.** Photograph of a 100 mL-volume pressure-tight autoclave reactor (TPR6-VS2-100, Taiatsu Techno®) used for the perchlorination reaction of CB<sub>11</sub>H<sub>12</sub><sup>-</sup> (1).
